# Supplementary material
Source: PubMed Central journal article supplement (PMC4059408)
Supplement: NIHMS502828-supplement-01.pdf [file NIHMS502828-supplement-01.pdf]

501 **SUPPLEMENTARY MATERIAL**

502

503 **Supplemental Table 1. Characteristics of within-population balancing selection versus**  
 504 **local adaptation via SVS.**

505

| <b>Feature</b>                                                                        | <b>Balanced local polymorphism</b>                          | <b>Local adaptation (population divergence)</b> | <b>Notes</b>                                                                                                                                                                                                                                                      |
|---------------------------------------------------------------------------------------|-------------------------------------------------------------|-------------------------------------------------|-------------------------------------------------------------------------------------------------------------------------------------------------------------------------------------------------------------------------------------------------------------------|
| <b><i>Spatial scale of environmental heterogeneity (patch size)</i></b>               | Fine patches (patch size << geographic range of population) | Coarse patches or clinal variation              | “Coarse” patches are a simplified view of situations where relative contribution of “fine” patches to local environment differs.                                                                                                                                  |
| <b><i>Relative gene flow between patches</i></b>                                      | High                                                        | Low-moderate                                    | Assortative mating, short-range dispersal, and oviposition/feeding preference can reduce gene flow and promote balanced local polymorphisms (and, if strong enough, promote host race formation). [1-3]                                                           |
| <b><i>Observed fitness effects between patches</i></b>                                | Antagonistic pleiotropy                                     | Antagonistic pleiotropy; conditional neutrality | Conditional neutrality is not expected to maintain long-term polymorphism, but is often observed in local adaptation. Undetected antagonistic pleiotropy could be due to methodological biases/limitations, or result from low gene flow between populations. [4] |
| <b><i>Type of selection within populations on contextually beneficial alleles</i></b> | Antagonistic selection                                      | Positive directional selection                  | Assumes a classical local adaptation model in which one allele sweeps to high frequency; local adaptation can also proceed through shifts in allele frequencies across populations.                                                                               |
| <b><i>Relative speed of a selective sweep</i></b>                                     | Slow                                                        | Fast                                            | Sweeps are slower for antagonistic selection than other forms of balancing selection, but allelic dominance reversals across patches or co-occurring frequency dependent selection reduce the magnitude of this effect. [5]                                       |

|                                                                                           |                                                           |                                                          |                                                                                                                                                                                                                            |
|-------------------------------------------------------------------------------------------|-----------------------------------------------------------|----------------------------------------------------------|----------------------------------------------------------------------------------------------------------------------------------------------------------------------------------------------------------------------------|
| <b><i>Polymorphism at causative sites in contextually beneficial alleles</i></b>          | Elevated within populations;<br>elevated at species level | Reduced within populations;<br>elevated at species level | Fine and coarse-grained spatially variable selection maintain polymorphism over different scales (within vs. among populations).                                                                                           |
| <b><i>Population divergence at causative sites in contextually beneficial alleles</i></b> | Reduced                                                   | Elevated                                                 | Selection for standing variation can lead to <i>reduced</i> inter-population divergence between populations inhabiting similar habitats and <i>elevated</i> divergence between populations inhabiting dissimilar habitats. |

507 **Supplemental Table 2. Population and quantitative genetic methods to detect balancing**  
 508 **selection driven by spatial variation.** Note that other forms of balancing selection may leave  
 509 similar signatures when looking within single populations.

| Temporal Scale [6] | Nature of evidence for adaptation [with key references]                | Application to balanced local polymorphism                                      | Application to locally adaptive divergence                                                                                                                               | Notes and/or explanations                                                                                                                                                                                                                                                                                  |
|--------------------|------------------------------------------------------------------------|---------------------------------------------------------------------------------|--------------------------------------------------------------------------------------------------------------------------------------------------------------------------|------------------------------------------------------------------------------------------------------------------------------------------------------------------------------------------------------------------------------------------------------------------------------------------------------------|
| Current Generation | Association of genotype with fitness or fitness-related traits [7-11]  | QTL mapping, genome-wide association studies, evolve-and-resequence experiments | QTL mapping, genome-wide association studies, evolve-and-resequence experiments                                                                                          | Large mapping populations incorporate information from many recombination events, increasing mapping resolution.                                                                                                                                                                                           |
|                    | Association of genotype with habitat characteristics in the field [12] | Correlation of genotype with habitat for individuals <i>within</i> populations  | Correlation of allele frequencies with habitat characteristics across many populations                                                                                   | Allele frequency differences could be maintained by many forces, e.g. differential insect preference or performance on different plants, or plant performance when exposed to different insect communities.                                                                                                |
| Recent Past        | Interpopulation divergence [13-16]                                     | $\downarrow (F_{ST})$                                                           | $\uparrow (F_{ST})$ between populations in divergent patches, but $\downarrow (F_{ST})$ following parallel adaptation to similar patches from standing genetic variation | Forces favoring within-population polymorphism or alternative alleles in different populations slow or accelerate divergence at those loci, respectively, relative to genetic drift. Hierarchical outlier analysis can identify alleles under SVS in a background of neutral population genetic structure. |
|                    | Linkage disequilibrium (LD) [5,17]                                     | Each favored variant falls within                                               | Locally favored variants will be within                                                                                                                                  | Haplotype-based tests are powerful for detecting rapid partial sweeps, but unclear                                                                                                                                                                                                                         |

|              |                                                   |                                                                           |                                                                        |                                                                                                                                                                                                                                   |
|--------------|---------------------------------------------------|---------------------------------------------------------------------------|------------------------------------------------------------------------|-----------------------------------------------------------------------------------------------------------------------------------------------------------------------------------------------------------------------------------|
|              |                                                   | extended, intermediate frequency haplotypes                               | extended, high frequency haplotypes                                    | whether many of the slow sweeps under spatially varying selection leave detectable genomic signatures.                                                                                                                            |
|              | Allele frequency spectrum [18,19]                 | Excess of intermediate frequency alleles (Tajima's D)                     | Excess of rare alleles (Tajima's D)                                    | Uncommon variants linked to selected haplotype(s) rise to intermediate frequency when multiple haplotypes are favored in a population (but see above). Demographic changes and population subdivision strongly affect Tajima's D. |
| Distant Past | Polymorphism ( $\pi$ ) vs. divergence (d) [20-22] | Elevated $\pi/d$ (HKA test), excess non-synonymous polymorphism (MK test) | Reduced $\pi/d$ (HKA test), excess non-synonymous divergence (MK test) | Careful thought is required to identify the appropriate scale to estimate polymorphism and divergence (e.g. within or among populations or species). Using outgroups to polarize changes is desired.                              |
|              | Trans-species polymorphism [23]                   | Small haplotypes shared between species                                   |                                                                        | Various forms of balancing selection can preserve polymorphism for long periods, but recombination and mutation erode this pattern at neutral sites linked to the causal variants.                                                |

510

511

512 **Supplemental Table 3: Distribution records for *Scaptomyza flava* (including synonyms *S.***  
 513 ***flaveola*, *S. apicalis*, and *S. montana*).**

| Country       | Subnational area or island | <i>S. flava</i> reference |
|---------------|----------------------------|---------------------------|
| United States | Alaska                     | [2]                       |
|               | New York                   | [2]                       |
|               | Connecticut                | [2]                       |
|               | Massachusetts              | Personal collection, [2]  |
|               | New York                   | [2]                       |
|               | Indiana                    | [2]                       |
|               | Maryland                   | [2]                       |
|               | Washington, DC             | [2]                       |
|               | California                 | [2]                       |
|               | Idaho                      | [2]                       |
|               | Oregon                     | [2]                       |
|               | Virginia                   | [2]                       |
|               | Arizona                    | Personal collection       |
| Canada        | Nova Scotia                | [2]                       |
| Russia        | Far East                   | [8]                       |
|               | Eastern Siberia            | [8]                       |
|               | Western Siberia            | [8]                       |
|               | European                   | [8]                       |
| China         | Xinjiang                   | [9]                       |
| Portugal      | Mainland                   | [11]                      |
|               | Azores                     | [2]                       |
|               | Madeira Islands            | [2]                       |

|                |                |      |
|----------------|----------------|------|
| Spain          | Mainland       | [11] |
|                | Canary Islands | [2]  |
| Czech Republic |                | [4]  |
| Slovakia       |                | [4]  |
| United Kingdom |                | [10] |
| Ireland        |                | [10] |
| Germany        |                | [10] |
| Italy          |                | [10] |
| Netherlands    |                | [10] |
| Belgium        |                | [10] |
| Finland        |                | [3]  |
| Norway         |                | [1]  |
| Sweden         |                | [1]  |
| Denmark        |                | [1]  |
| Turkey         |                | [1]  |
| Austria        |                | [1]  |
| Switzerland    |                | [1]  |
| Estonia        |                | [1]  |
| Latvia         |                | [1]  |
| Lithuania      |                | [1]  |
| Poland         |                | [1]  |
| France         | mainland       | [11] |
|                | Corsica        | [11] |
| Greece         | Mainland       | [11] |
|                | Crete          | [11] |

|                        |  |      |
|------------------------|--|------|
| Ukraine                |  | [11] |
| Bulgaria               |  | [11] |
| Romania                |  | [11] |
| Bosnia and Herzegovina |  | [11] |
| Slovenia               |  | [11] |
| Serbia                 |  | [11] |
| Macedonia              |  | [11] |
| Croatia                |  | [11] |
| Uzbekistan             |  | [8]  |
| Mongolia               |  | [6]  |
| New Zealand            |  | [5]  |
| Iran                   |  | [7]  |
| Japan                  |  | [8]  |

515 **References for Supplemental Tables 1-2**

- 516 [1] Levene H: Genetic equilibrium when more than one ecological niche is available. *Amer Nat*  
517 1953, 87:331-333.
- 518 [2] Yeaman S, Otto SP: Establishment and maintenance of adaptive genetic divergence under  
519 migration, selection, and drift. *Evolution* 2011, 65:2123-2129.
- 520 [3] Drès M, Mallet J: Host races in plant-feeding insects and their importance in sympatric  
521 speciation. *Philosophical Transactions of the Royal Society of London. Series B: Biological*  
522 *Sciences* 2002, 357:471-492.
- 523 [4] Colautti RI, Lee C, Mitchell-Olds T: Origin, fate, and architecture of ecologically relevant  
524 genetic variation. *Curr Opin Plant Biol* 2012, 15:199-204.
- 525 [5] Connallon T, Clark AG: Antagonistic versus nonantagonistic models of balancing selection:  
526 characterizing the relative timescales and hitchhiking effects of partial selective sweeps.  
527 *Evolution* 2013, 67:908-917.
- 528 [6] Hedrick PW: Genetic polymorphism in heterogeneous environments: The Age of Genomics.  
529 *Annu Rev Ecol Evol Syst* 2006, 37:67-93.
- 530 [7] Kloth KJ, Thoen MP, Bouwmeester HJ, Jongsma MA, Dicke M: Association mapping of plant  
531 resistance to insects. *Trends Plant Sci* 2012, 17:311-319.
- 532 [8] Kawecki TJ, Lenski RE, Ebert D, Hollis B, Olivieri I, Whitlock MC: Experimental evolution.  
533 *Trends in Ecology & Evolution* 2012, 27:547-560.
- 534 [9] Turner TL, Stewart AD, Fields AT, Rice WR, Tarone AM: Population-based resequencing of  
535 experimentally evolved populations reveals the genetic basis of body size variation in  
536 *Drosophila melanogaster*. *PLoS Genet* 2011, 7:e1001336.
- 537 [10] Prasad KV, Song BH, Olson-Manning C, Anderson JT, Lee CR, Schranz ME, Windsor AJ,  
538 Clauss MJ, Manzaneda AJ, Naqvi I *et al.*: A gain-of-function polymorphism controlling complex  
539 traits and fitness in nature. *Science* 2012, 337:1081-1084.
- 540 [11] Bradshaw WE, Emerson KJ, Catchen JM, Cresko WA, Holzapfel CM: Footprints in time:  
541 comparative quantitative trait loci mapping of the pitcher-plant mosquito, *Wyeomyia smithii*.  
542 *Proceedings of the Royal Society B: Biological Sciences* 2012, 22:4551-4558.
- 543 [12] Hancock AM, Brachi B, Faure N, Horton MW, Jarymowycz LB, Sperone FG, Toomajian C,  
544 Roux F, Bergelson J: Adaptation to climate across the *Arabidopsis thaliana* genome. *Science*  
545 2011, 334:83-86.
- 546 [13] Wright S: The genetical structure of populations. *Annals of Eugenics* 1951, 15:323-354.
- 547 [14] Kolaczkowski B, Kern AD, Holloway AK, Begun DJ: Genomic differentiation between  
548 temperate and tropical Australian populations of *Drosophila melanogaster*. *Genetics* 2011,  
549 187:245-260.



- 550 [15] Le Corre V, Kremer A: The genetic differentiation at quantitative trait loci under local  
551 adaptation. *Mol Ecol* 2012, 21:1548-1566.
- 552 [16] Narum SR, Hess JE: Comparison of FST outlier tests for SNP loci under selection.  
553 *Molecular Ecology Resources* 2011, 11:184-194.
- 554 [17] Charlesworth D: Balancing Selection and Its Effects on Sequences in Nearby Genome  
555 Regions. *PLoS Genet* 2006, 2:e64.
- 556 [18] Tajima F: Statistical method for testing the neutral mutation hypothesis by DNA  
557 polymorphism. *Genetics* 1989, 123:585-595.
- 558 [19] Amambua-Ngwa A, Tetteh KKA, Manske M, Gomez-Escobar N, Stewart LB, Deerhake ME,  
559 Cheeseman IH, Newbold CI, Holder AA, Knuepfer E *et al.*: Population Genomic Scan for  
560 Candidate Signatures of Balancing Selection to Guide Antigen Characterization in Malaria  
561 Parasites. *PLoS Genet* 2012, 8:e1002992.
- 562 [20] Hudson RR, Kreitman M, Aguadé M: A test of neutral molecular evolution based on  
563 nucleotide data. *Genetics* 1987, 116:153-159.
- 564 [21] McDonald JH, Kreitman M: Adaptive protein evolution at the *Adh* locus in *Drosophila*.  
565 *Nature* 1991, 351:652-654.
- 566 [22] Verrelli BC, McDonald JH, Argyropoulos G, Destro-Bisol G, Froment A, Drousiotou A,  
567 Lefranc G, Helal AN, Loiselet J, Tishkoff SA: Evidence for Balancing Selection from Nucleotide  
568 Sequence Analyses of Human *G6PD*. *The American Journal of Human Genetics* 2002,  
569 71:1112-1128.
- 570 [23] Leffler EM, Gao Z, Pfeifer S, Ségurel L, Auton A, Venn O, Bowden R, Bontrop R, Wall JD,  
571 Sella G *et al.*: Multiple Instances of Ancient Balancing Selection Shared Between Humans and  
572 Chimpanzees. *Science* 2013, published online 14 Feb 2013.

573

### 574 **References for Supplemental Table 3**

- 575 [1] Bächli G, Vilela,CR, Andersson Escher,S, Saura,A: The Drosophilidae (Diptera) of  
576 Fennoscandia and Denmark. Brill; 2004.
- 577
- 578 [2] Hackman W: On the genus *Scaptomyza* Hardy (Dipt., Drosophilidae): with descriptions of  
579 new species from various parts of the world. *Acta Zool. Fenn.* 1959, 97.
- 580
- 581 [3] Hackman W: On the genera *Scaptomyza* Hardy and *Parascaptomyza* Duda (Dipt.,  
582 Drosophilidae) 1955, 35.
- 583
- 584 [4] Maca J: Czechoslovak species of the genus *Scaptomyza* Hardy (Diptera,  
585 Drosophilidae) and their bionomics. *Act. Ent. Bohemoslov.* 1972, 69: 119-132.
- 586

- 587 [5] Martin NA: History of an invader, *Scaptomyza flava* (Fallen, 1823) (Diptera:  
588 Drosophilidae). *N.Z. J. Zool.* 2004, 31: 27-32.  
589
- 590 [6] Okada T: Drosophilidae and Diastatidae from Mongolia (Diptera). *Ann. Hist.-nat.*  
591 *Mus. Nat. Hung.* 1973, 65: 271-279.  
592
- 593 [7] Seraj AA: Comparison of Plant Species as Host for Cabbage Leaf Miner in  
594 Khuzestan Province. *J. Agr. Sci. Tech.* 2000, 2: 127-135.  
595
- 596 [8] Toda MJ, Sidorenko VS, Watabe H, Kholin SK, Vinokurov NN: A revision of the  
597 Drosophilidae (Diptera) in the east Siberia and Russian far east: Taxonomy and  
598 Biogeography. *Zool. Sci.* 1996, 13: 455-477.  
599
- 600 [9] Watabe H, Toda MJ, Li GC, Duan CL, Rahman I, Borrathybay E, Abdukerim M: Drosophilid  
601 Fauna (Diptera, Drosophilidae) of Chinese Central Asia. *Jpn. J. Ent.* 1993, 61: 525-545.  
602
- 603 [10] Entomology specimen collections database, Natural History Museum, London:  
604 [http://www.nhm.ac.uk/research-curation/scientific-resources/collections/entomological-](http://www.nhm.ac.uk/research-curation/scientific-resources/collections/entomological-collections/entomology-specimen-database)  
605 [collections/entomology-specimen-database.](http://www.nhm.ac.uk/research-curation/scientific-resources/collections/entomological-collections/entomology-specimen-database)  
606
- 607 [11] Bächli, G. (2012) Fauna Europaea: Drosophilidae. In: Pape, T. & Beuk, P. (2012) Fauna  
608 Europaea: Diptera. Fauna Europaea version 2.5, <http://www.faunaeur.org>.
